# Supplementary material for: Usability of Electronic Health Record–Generated Discharge Summaries: Heuristic Evaluation
Source: PubMed Central journal article supplement (PMC8085750; doi:10.2196/25657), 2021-04-15
Supplement: jmir_v23i4e25657_app7.pdf [file jmir_v23i4e25657_app7.pdf]

## ChartH2P1

MRN: XXXXXXXX

XXXXXXXX, MD  
Physician  
Cardiology

Discharge Summary  
Signed

Note Time: xx/xx/xxxx 11:09 AM  
Creation Time: xx/xx/xxxx 11:09 AM

## Physician Discharge Summary

**Pt Name** ChartH2P1

**MRN:** XXXXXXXX

**Age:** xx y.o. **DOB:**  
xx/xx/xxxx

**Admit date:** xx/xx/xxxx 3:11 PM

**Discharge date:** xx/xx/xxxx

**Primary Care Physician:**

XXXXXXXX, MD  
Address Removed  
Phone: xxx-xxx-xxxx  
Fax: xxx-xxx-xxxx

**Allergies:** Patient has no known allergies.

**Admitting Physician:** XXXXXXXX, MD

**Discharge Physician:** XXXXXXXX, MD

**Admission Diagnoses:** NSTEMI (non-ST elevated myocardial infarction) (HCC) [I21.4]

**Discharge Diagnoses:**

1. Late presentation of MI now s/p 2V CABG (LIMA-LAD and SVG-OM)
2. 2D echo xx/xx/xxxx with EF 45-50% (improved from Preop EF 40%)
3. Hypotension-improving
4. Post op AFib x several days
5. Leukocytosis

**Hospital Course:**

Ms. XXXXXXXX is a xx year old female who presented as transfer due to NSTEMI. She underwent cardiac cath on xx/xx/xxxx which showed severe distal LM and LAD/diagonal disease, mild LV dysfunction with severe antero-lateral hypokinesis- EF 40%. CT surgery was consulted and she underwent CABG x 2 (LIMA-LAD, SVG-OM) on xx/xx/xxxx. 2D echo post surgery did show some improvement of EF, with LV function 45-50%. Post op stay was complicated by Hypotension, AKI and low urine output, all of which have improved. However, she does remain mildly hypotensive at times (SBP 90s-100s), though asymptomatic. In addition, she went into post op Afib. She was started on amiodarone and oral anticoagulation with coumadin. CT surgery prefers use of coumadin for first 4 weeks post surgery. After that time, patient can be switched to DOAC if needed. She had no complaints of chest pain or SOB.

**Significant Diagnostic Studies:**

## Hospital 2, Patient 1 (H2P1)

---

1. CXR xx/xx/xxxx stable, mild bibasilar opacities.
2. 2D echo xx/xx/xxxx showing 45-50%, small hematoma overlying RV but it is difficult to distinguish from pericardial fat, mild global hypokinesis, mod- severe TR

**Disposition:** to rehab

**Patient Instructions:**

**Discharge Medications:**

Your Current Medication List

|                                                                              |                                                                       |
|------------------------------------------------------------------------------|-----------------------------------------------------------------------|
| <b>acetaminophen (TYLENOL) 325 mg Oral tablet (Taking)</b>                   | take 2 Tabs by mouth Every 6 hours as needed.                         |
| <b>AMIODArone (PACERONE) 400 mg Oral tablet (Taking)</b>                     | take 1 Tab by mouth Every 8 hours for 2 days.                         |
| <b>AMIODArone (PACERONE) 200 mg Oral tablet</b>                              | <b>Starting on xx/xx/xxxx.</b> take 1 Tab by mouth Daily.             |
| <b>aspirin 81 mg Oral tablet</b>                                             | <b>Starting on xx/xx/xxxx.</b> 1 Tab by chew and swallow route Daily. |
| <b>atorvastatin (LIPITOR) 80 mg Oral tablet (Taking)</b>                     | take 1 Tab by mouth Every evening.                                    |
| <b>docusate sodium (COLACE) 100 mg Oral capsule (Taking)</b>                 | take 1 Cap by mouth 2 times daily.                                    |
| <b>metoprolol succinate XL 25 mg extended-release tablet (Taking)</b>        | take 1 Tab by mouth Daily.                                            |
| <b>pantoprazole (PROTONIX) 40 mg Oral tablet</b>                             | <b>Starting on xx/xx/xxxx.</b> take 40 mg by mouth DAILY at 6AM.      |
| <b>polyethylene glycol (MIRALAX) 17 gram Oral packet</b>                     | <b>Starting on xx/xx/xxxx.</b> take 1 Packet by mouth Daily.          |
| <b>warfarin (COUMADIN) 2.5 mg Oral tablet (Taking)</b>                       | take 1 Tab by mouth Daily.                                            |
| <b>estrogens, conjugated, (PREMARIN) 0.625 mg/gram Vaginal crea (Taking)</b> | by Vaginal route. As instructed                                       |

### Follow-up information:

Follow-up Information

XXXXXXXX, MD. Schedule an appointment as soon as possible for a visit in 2 weeks.

Specialty: REFERRING

Contact information

Address Removed

xxx-xxx-xxxx

Please follow up.

Why: need labwork: bmp/cbc in 1 week; PT/INR on xx/xx/xxxx

## Hospital 2, Patient 1 (H2P1)

---

XXXXXXXX, APN On xx/xx/xxxx.

Why: at 2pm

Contact information

Address Removed

Phone xxx.xxx.xxxx

XXXXXXXX, MD. Go on xx/xx/xxx.

Specialty: SURGERY,CARDIOTHORACIC

Why: @ 11:30 am.

Contact information

Address Removed

xxx.xxx.xxx

### Additional Providers to receive this summary:

**Signed:**

XXXXXXXX, APN

xx/xx/xxx

11:09 AM
