# Supplementary material for: Usability of Electronic Health Record–Generated Discharge Summaries: Heuristic Evaluation
Source: PubMed Central journal article supplement (PMC8085750; doi:10.2196/25657), 2021-04-15
Supplement: jmir_v23i4e25657_app8.pdf [file jmir_v23i4e25657_app8.pdf]

## ChartH2P2

MRN: XXXXXXXX

XXXXXXXX, MD  
Physician  
Hospitalist

Discharge Summary  
Signed

Note Time: xx/xx/xxxx 1:42 PM  
Creation Time: xx/xx/xxxx 1:42 PM

## Physician Discharge Summary

**Pt Name:** ChartH2P2

**MRN:** XXXXXXXX

**Age:** xx y.o.

**DOB:** xx/xx/xxxx

**Admit date:** xx/xx/xxxx 8:13 PM

**Discharge date:** xx/xx/xxxx

**Primary Care Physician:**

Physician, No Pcp

Phone: xxx-xxx-xxxx

Fax: xxx-xxx-xxxx

**Allergies:** Patient has no known allergies.

**Admitting Physician:** XXXXXXXX, DO

**Discharge Physician:** XXXXXXXX, MD

**Admission Diagnoses:** Hip fracture (HCC) [S72.009A]

**Discharge Diagnoses:**

**Active Hospital Problems**

Diagnosis

- \*Femur fracture, left (HCC)

**Resolved Hospital Problems**

Diagnosis

No resolved problems to display.

**Admitting Condition:** poor

**Discharged Condition:** good

**Hospital Course:** XXXXXXXX is an xx y.o. xxxxx female w/ PMHx of HTN and rheumatic fever who presented with left proximal intertrochanteric comminuted fracture after mechanical fall now s/p cephalomedullary nail (xx/xx). Patient was in her backyard and she picked up a ball and lost her balance when she threw the ball back. Patient lives alone and is able to carry out most of her ADLS. Post-operatively patient required 1 unit PRBC with appropriate response in hemoglobin. On admission patient was also found to be hypotensive with AKI, likely pre-renal. Home anti-hypertensives were held.

## Hospital 2, Patient 2 (H2P2)

---

- # Acute pathologic left Hip Fracture
- POD #3 s/p L hip cephalomedullary nail
- pain control
- vitamin D, TSH, PTH all within normal limits
- PT consult, WBAT
- pending rehab placement

- # Acute urinary retention:
- likely related to post-op as patient has been immobile as well as pain meds
- repeat bladder scans and straight cath as needed
- may require foley catheter

- # AKI- resolved
- baseline Cr 0.8
- likely pre-renal in the setting of post-op and relative hypotension
- gentle hydration
- continue to monitor

- # Acute blood loss Anemia:
- normocytic at baseline
- exacerbated post-op
- continue to monitor
- transfuse for Hgb <7

- # Hx of HTN
- home regimen metoprolol 50 mg BID, HCTZ 25 mg, amlodipine 2.5 mg
- initially hypotensive so BP meds held, will slowly restart as BP tolerates

### Significant Diagnostic Studies:

XR FEMUR LEFT 2 VW

#### Final Result

Intraoperative and postoperative radiographs demonstrating open reduction internal fixation of left femoral intertrochanteric neck fracture.

Signing Provider: XXXXXXXX

XR FEMUR LEFT 2 VW

#### Final Result

Intraoperative and postoperative radiographs demonstrating open reduction internal fixation of left femoral intertrochanteric neck fracture.

Signing Provider: XXXXXXXX

XR TECH TIME NO IMAGING 60 MINUTES

#### Final Result

XR TECH TIME NO IMAGING 60 MINUTES

#### Final Result

XR TECH TIME NO IMAGING 60 MINUTES

#### Final Result

STORE IMAGES OUTSIDE XRAY

**Final Result**

**XR PORTABLE FEMUR 2 VIEWS LEFT**

**Final Result**

Again seen is a comminuted intertrochanteric left femoral fracture

Signing Provider: XXXXXXXX

**XR ELBOW LEFT 3 VW MIN**

**Final Result**

No acute osseous abnormality.

Signing Provider: XXXXXXXX

**CT ABDOMEN AND PELVIS W IV CONTRAST**

**Final Result**

1. Acute, comminuted fracture of the left proximal femur intertrochanteric region, as above. Associated hematoma within the muscles of the left proximal thigh. There are a few areas of high density material associated with these hematomas, as detailed above. Differential diagnosis includes bony fragments versus small amount of contrast blush related to active hemorrhage

2. Low-density indeterminate nodule in the right adrenal gland measuring 1.5 cm, may be further evaluated with nonemergent multiphase CT or MRI.

3. Aneurysmal dilatation of the descending thoracic aorta measuring up to 3.8 cm

COMMUNICATION: Findings discussed with Dr. XXXXXXXX on xx/xx/xxxx at 9:22 PM

Signing Provider: XXXXXXXX

**XR PORTABLE CHEST 1 VIEW ONLY**

**Final Result**

No acute cardiopulmonary disease

Signing Provider: XXXXXXXX

**Disposition:** Data Unavailable

**Patient Instructions:**

## Hospital 2, Patient 2 (H2P2)

---

### Discharge Medications:

Your Current Medication List

|                                                                     |                                                |
|---------------------------------------------------------------------|------------------------------------------------|
| <b>enoxaparin (LOVENOX) 40 mg/0.4 ml Subcutaneous syrg (Taking)</b> | 40 mg by Subcutaneous route DAILY for 10 days. |
| <b>multivitamin Oral tablet (Taking)</b>                            | take 1 Tab by mouth Daily.                     |
| <b>CALCIUM ORAL (Taking)</b>                                        | take 1 Tab by mouth DAILY.                     |
| <b>hydroCHLOROthiazide (HYDRODIURIL) 25 mg Oral tablet (Taking)</b> | take 25 mg by mouth Daily                      |
| <b>metoprolol TARTRATE 50 mg tablet (Taking)</b>                    | take 50 mg by mouth 2 times daily.             |
| <b>amLODIPine (NORVASC) 2.5 mg Oral tablet (Taking)</b>             | take 2.5 mg by mouth Daily.                    |

### Follow-up Procedures and tests:

No discharge procedures on file.

**Activity:** activity as tolerated

**Diet:** Regular Diet

**Wound Care:** None needed

### Follow-up information:

Follow-up Information

Call Appointments Orthopaedics. Contact information

Address Removed

xxx-xxx-xxx

**Additional Providers to receive this summary:**

### Signed:

XXXXXXXX, MD

xx/xx/xxx

1:42 PM
